# Supplementary material for: Structural basis of BAK activation in mitochondrial apoptosis initiation
Source: PubMed Central journal article supplement (PMC8752837; doi:10.1038/s41467-021-27851-y), 2022-01-11
Supplement: 41467_2021_27851_MOESM3_ESM.pdf [file 41467_2021_27851_MOESM3_ESM.pdf]

### Description of Additional Supplementary Files

File Name: Supplementary Movie 1

Description: **BH3 ligand induced conformational changes in BAK.** Morphing of the helix  $\alpha$ 1-stabilizing electrostatic network between apo and BH3 ligand bound conformations were generated in PyMOL.

File Name: Supplementary Movie 2

Description: **Direct activation and autoactivation cooperate to amplify BAK activation signaling.**
